1 Phenotypic heterogeneity is adaptive for microbial populations under starvation

2

3 Monika Opalek<sup>a#</sup>, Bogna Smug<sup>b</sup>, Michael Doebeli<sup>c</sup>, Dominika Wloch-Salamon<sup>a#</sup>

4

5 <sup>a</sup>Jagiellonian University, Faculty of Biology, Institute of Environmental Sciences, Kraków, Poland

6 <sup>b</sup>Malopolska Centre of Biotechnology, Jagiellonian University, Kraków, Poland

7 <sup>c</sup>University of British Columbia, Vancouver, Canada

8

9 Running title: Microbial heterogeneity in starvation

10

11 # Address correspondence to:

12 D. Wloch-Salamon, [dominika.wloch-salamon@uj.edu.pl](mailto:dominika.wloch-salamon@uj.edu.pl) and

13 M. Opalek, [monika.opalek@doctoral.uj.edu.pl](mailto:monika.opalek@doctoral.uj.edu.pl).

14

15 word count for the abstract: 209

16 word count for the text: 4560

17 **Title**

18 **Phenotypic heterogeneity is adaptive for microbial populations under starvation**

19

20 **Abstract**

21 To persist in variable environments populations of microorganisms have to survive periods of  
22 starvation and be able to restart cell division in nutrient-rich conditions. Typically, starvation  
23 signals initiate a transition to a quiescent state in a fraction of individual cells, while the rest of the  
24 cells remain non-quiescent. It is widely believed that, while quiescent cells (Q) help the population  
25 to survive long starvation, the non-quiescent cells (NQ) are a side effect of imperfect transition.  
26 We analysed regrowth of starved monocultures of Q and NQ cells compared to mixed,  
27 heterogeneous cultures in simple and complex starvation environments. Our experiments, as well  
28 as mathematical modelling, demonstrate that Q monocultures benefit from better survival during  
29 long starvation, and from a shorter lag phase after resupply of rich medium. However, when the  
30 starvation period is very short, the NQ monocultures outperform Q and mixed cultures, due to  
31 their short lag phase. In addition, only NQ monocultures benefit from complex starvation  
32 environments, where nutrient recycling is possible. Our study suggests that phenotypic  
33 heterogeneity in starved populations could be a form of bet hedging, which is adaptive when  
34 environmental determinants, such as the length of the starvation period, the length of the regrowth  
35 phase, and the complexity of the starvation environment vary over time.

36 **Importance**

37 Non-genetic cell heterogeneity is present in glucose starved yeast populations in the form of  
38 quiescent (Q) and nonquiescent (NQ) phenotypes. There is evidence that Q cells help the  
39 population to survive long starvation. However, the role of the NQ cell type is not known, and it  
40 has been speculated that the NQ phenotype is just a side effect of imperfect transition to the Q  
41 phenotype. Here we show that, in contrast, there are ecological scenarios in which NQ cells  
42 perform better than monocultures of Q cells or naturally occurring mixed populations containing  
43 both Q and NQ. NQ cells benefit when the starvation period is very short and environmental  
44 conditions allow nutrient recycling during starvation. Our experimental and mathematical  
45 modeling results suggest a novel hypothesis: the presence of both Q and NQ phenotypes within  
46 starved yeast populations may reflect a form of bet hedging, where different phenotypes provide  
47 fitness advantages depending on environmental conditions.

## 48 **Introduction**

### 49 **Stationary phase is heterogenous**

50 Survival of microbial populations depends on the individual cells' ability to adjust their phenotype  
51 in response to challenging environmental conditions. Structured environments, ageing, and  
52 nutrient limitation have been identified as factors driving non-genetic heterogeneity visible as  
53 multiple cellular phenotypes present in microbial populations [1–3]. In particular, transition to  
54 quiescent or other spore-like cell type induced by starvation is a phenotype of fundamental  
55 importance in medical microbial biology. Not only does it play a crucial role in biofilm forming  
56 [4], but it is also significant in cancer formation [5]. Quiescence is well studied in the yeast  
57 *Saccharomyces cerevisiae*, where a fraction of cells undergo specific molecular and cellular  
58 reprogramming, and actively cease division, when there is a lack of essential resources. As a  
59 consequence, in the stationary phase, genetically clonal yeast population contains a mixture of  
60 non-quiescent (NQ), quiescent (Q) and dead cells.

61 The quiescent phenotype is complex, and its precise characterisation is the subject of ongoing  
62 research [6–8]. Q cells' testing is also extremely challenging, because once they re-enter the cell  
63 cycle they are no longer in the quiescent state. Yet, studying quiescence in *S. cerevisiae* has the  
64 unique advantage of the possibility of obtaining the fractions of Q and NQ cells by centrifugation  
65 on a density gradient [9–12]: Q cells are gathered in the denser, lower fraction, while the upper,  
66 less dense fraction predominantly consists of NQ cells. Quiescent yeast cells can be characterised  
67 by a thickened cell wall, dense vacuole and an accumulation of storage materials such as trehalose  
68 [5,9,13,14]. While starved, NQ cells stop at various stages of the mitotic cell cycle and do not  
69 undergo transition to Q. As a consequence, NQ cells vary in internal organisation and are more  
70 heterogeneous than Q cells. Differentiation into quiescence starts in growing yeast populations  
71 after the first signals of starvation, ca. 20 hours of inoculation in glucose rich medium. For  
72 common laboratory prototrophic *S.cerevisiae* strain S288C Q:NQ cells ratio is about 70:30  
73 [9,11,15,16].

74 While it is the whole population of Q and NQ cells that experience starvation, Q cells with their  
75 adaptation to long starvation survival, stress tolerant viability and higher recovery speed are the  
76 ones responsible for population re-growth [9,11,17]. Thus, evolved enrichment of Q cells in  
77 starved populations (up to 95%) resulted in significant increase of re-growth abilities after 22 days  
78 of starvation [15]. Other research showed that after 4 weeks of starvation, Q cells exhibited 87%  
79 viability while only 3% of NQ cells were still viable (counted as CFU [9]). Q cells also survive

80 higher amounts of stress, such as temperature [9,11] and toxins (including antifungals [4]).  
81 Regrowth abilities of Q and NQ cells were checked separately after culture fractionations,  
82 however, in most of the experimental set ups, stress was applied to the unseparated stationary  
83 phase population consisting of certain mixtures of Q and NQ cells [10,18–20].

84 The Q/NQ population balance can be affected by many factors [17]. It was shown that the Q/NQ  
85 ratio can be modified by selection to some extent, however both Q and NQ cells appear to always  
86 be present in stationary populations [10,15,21]. This raises the important question of how the  
87 Q/NQ balance evolves in various ecological scenarios. Because of the apparently clear advantage  
88 of Q cells in stress survival, the presence of NQ cells could be an inevitable by-product of cellular  
89 physiology, with no particular adaptive significance. For example, it was hypothesized that  
90 replicative ageing is a factor determining the transition to quiescence: the presence of NQ cells in  
91 a starved population would simply reflect the inability of old cells to enter quiescence [19].  
92 However recent research using more advanced laboratory techniques questioned this interpretation  
93 [11]. Alternatively, the presence of both Q and NQ phenotypes within starved population may  
94 reflect some form of bet hedging, where different phenotypes provide fitness advantage depending  
95 on environmental conditions [22–24].

### 96 **Is stationary phase heterogeneity advantageous for population's survival?**

97 Here we use population-level experiments to shed light on the adaptive significance of the Q/NQ  
98 cell ratio in yeast. We test whether populations composed entirely of Q cells (Q monoculture)  
99 have an ecological advantage over natural populations (mix culture with Q and NQ cells in 3:1  
100 ratio), as well as over NQ monocultures. These mixed cultures imitate the naturally occurring  
101 Q/NQ cell ratio in starved laboratory S288C strain and were therefore taken as a reference point.  
102 We monitored starvation survival of experimental cultures weekly via regrowth experiments (Fig.  
103 1. , see details in Materials and Methods). We describe populations' growth curves after various  
104 starvation lengths - long starvation scenario lasting from 1 to 6 weeks and short starvation scenario  
105 lasting 4 days. We analyse the impact of the environment during long starvation, where cells were  
106 suspended either in sterile water (simple environment) or spent medium (complex environment).  
107 Finally, we develop a mathematical model to explain our experimental results and to predict  
108 ecological outcomes.

109 Our experiments show that Q monocultures regrow relatively better than mixed cultures if the  
110 starvation phase is long enough, and that this advantage diminishes after longer regrowth time. We  
111 used the mathematical model to assess possible reasons for this advantage. The model supports the

112 notion that the ecological advantage of Q monocultures is due to lower death rate of Q cells during  
113 starvation, and to shorter lag times of Q cell after starvation periods longer than one week. We  
114 also demonstrate that, due to nutrient recycling, NQ monocultures do relatively better in complex  
115 than simple starvation environment. Finally, we hypothesise based on the model and confirm  
116 experimentally that NQ monocultures can regrow faster than Q monocultures when the starvation  
117 period is very short. Our conclusion is that the presence of both quiescent and non-quiescent cells  
118 could be advantageous for population survival in fluctuating environments because Q cells survive  
119 long starvation better and NQ cells restart divisions faster if the starvation period is short.  
120 Moreover, when there is a possibility of nutrient recycling in complex starvation environments,  
121 NQ cells may suffer less from unfavourable environmental conditions compared to simple  
122 environments. This supports the hypothesis that the existence of both cell types in natural  
123 populations could be a form of bet-hedging rather than the effect of imperfect transition into  
124 quiescence.

125

## 126 **Materials and Methods**

### 127 **Strain, Q and NQ cell acquisition**

128 We used a derivative of the laboratory haploid *Saccharomyces cerevisiae* strain s288C (Mat  $\alpha$ ,  
129 *ura3::KanMX4*) [Cubillos *et al.* 2009]. Yellow fluorescent marker (YFP) was amplified from  
130 genomic DNA from the BY4741-YFP.natR strain and integrated into the ancestral strain  
131 according to previously described protocols [26].

132 In order to obtain Q and NQ cells we applied a previously described fractionation procedure in a  
133 density gradient [9]. In short, an overnight culture was diluted tenfold and 100  $\mu$ l ( $\sim 2 \times 10^7$  cells)  
134 was incubated on an agar YPD plate for 4 days in 30°C (reaching cells density  $\sim 2 \times 10^8$ /ml). The  
135 density gradient was obtained by mixing Percoll and NaCl (1,5M) in proportion 9:1 v/v, and by  
136 subsequent centrifugation in angular rotor for 20 minutes at rcf = 10078g (centrifuge: MPW Med.  
137 Instruments model MPW-352R). Then the culture was washed from the plate (10 ml 50 mM Tris,  
138 pH=7.5), and 4 ml was pelleted, placed on the top of a density gradient and centrifuged in  
139 swinging-bucket rotor for 60 minutes at rcf = 417g. Upper (NQ cells) and lower (Q cells) fractions  
140 were carefully separated by pipets and placed in individual tubes (Fig. 1A). For long starvation  
141 scenario, harvested cells were stored at - 70°C in 25% glycerol until the beginning of the  
142 starvation experiment. For the short starvation scenario, harvested cells were immediately used to  
143 prepare experimental populations and placed for regrowth.

## 144 **Experimental long starvation scenario**

### 145 *Preparation of experimental populations*

146 For the long starvation scenario, cells stored at -70°C were thawed, merged accordingly to type  
147 (Q, NQ) and washed in sterile water 3 times. Q and NQ cells were diluted to equal density (OD =  
148 0.8, all OD measurements were taken with Multi-Mode Microplate Reader SpectraMax iD3, with  
149  $\lambda = 600$  nm) in sterile water. Then six types of experimental cultures (Q monoculture, NQ  
150 monocultures and Q+NQ mixed cultures, each in sterile H<sub>2</sub>O and spent medium) were set up, each  
151 type of experimental populations were prepared in 5 repetitions, 5 ml each, giving all together 30  
152 independently starved cultures. Mixed cultures were set up by mixing Q and NQ cells in 3:1 v/v  
153 proportions. Mixed cultures are treated as reference point because they mimic naturally occurring  
154 Q/NQ balance in the S288C yeast strain. Two **starvation media** were used: sterile water (*simple*  
155 *environment*) and spent medium (*complex environment*) (Fig.1B). To harvest spent medium, yeast  
156 cells of the same prototrophic S288C strain were inoculated in fresh YPD for 4 days, then cells  
157 were pelleted and supernatant was filtered and placed in a sterile container. The remaining cells  
158 were discarded. Lack of viable cells in the spent medium was confirmed by spreading samples of  
159 the harvested medium on YPD plate and incubation for 5 days in 30°C. No colony growth on these  
160 plates was observed.

161 For the long starvation scenario the cultures were kept at 30°C with shaking for 6 weeks. Samples  
162 from starving cultures were weekly checked for regrowth ability ("*regrowth procedure*"), starting  
163 1 week (7 days) after the start of the experiment.

### 164 *Regrowth procedure*

165 From each starving culture, a 275  $\mu$ l sample was taken and spun down, supernatant (starvation  
166 medium) was discarded, and cells were resuspended in 550  $\mu$ l of fresh YPD medium. Then 200  $\mu$ l  
167 was placed in a 96-well plate (flat bottom) in two repetitions. Additionally, *fresh cells* (inoculum:  
168 cells of the same S288C strain from liquid YPD medium incubated o/n in 30°C) were placed into  
169 the plate as a control. The plate was covered with transparent incubation foil and placed in the  
170 reader (SpectraMax iD3 Multi-Mode Microplate Reader) for 70h at 30°C with shaking. OD  
171 measurements ( $\lambda = 600$  nm) were taken every 30 minutes. The procedure was repeated weekly  
172 through the 6 weeks of the starvation experiment (Fig 1C).

## 173 **Experimental short starvation scenario**

174 Q and NQ cells were acquired in the same way as described above. Then, immediately after  
175 fractionation, Q and NQ cells were diluted to equal density (OD = 0.4), and the mixed culture was  
176 prepared by mixing Q and NQ cells in 3:1 proportion. Q monoculture, NQ monoculture and mixed  
177 culture were suspended in fresh liquid YPD medium. Then 150  $\mu$ l were put in a flat bottom 96-  
178 well plate in 16 repetitions for each culture type. The plate was covered in transparent incubation  
179 foil, placed in the reader for incubation at 30°C with shaking for 24 hours. OD measurements ( $\lambda$  =  
180 600 nm) were taken every 30 minutes.

### 181 **Relative biomass analysis**

182 OD values were first converted into biomass [cell number] according to the equation:

$$183 \quad \text{Biomass} = -2 \times 10^6 \times OD^3 + 3 \times 10^7 \times OD^2 + 3 \times 10^6 \times OD + 2.203 \times 10^5$$

184 The biomass values given throughout the manuscript are the number of cells present in 200 $\mu$ l,  
185 which is the total volume in a well (in 96-well plate) during regrowth. The equation was  
186 established by combining OD measurements ( $\lambda$  = 600 nm) and cell counting in a flow cytometer  
187 (Beckman Coulter CytoFLEX) after staining with propidium iodide (PI).

188 The data analysis was conducted after 24 hours (out of 70 hours) of regrowth, as this is the best  
189 time frame to capture differences between experimental populations. We compared how  
190 monocultures regrow after starvation in comparison to mixed cultures by relative biomass  
191 analysis. Relative biomass of a given monoculture was calculated as the ratio of its biomass and  
192 the average biomass of mixed cultures at a given time point of regrowth (“*weekly procedure*”).  
193 Relative biomass of mixed culture equals 1 on average (Fig. 2, Fig. 3).

194 To compare the effect of the starvation medium on the experimental populations survival (Fig. 4),  
195 relative biomass was calculated as the ratio of the biomass of an experimental culture of a given  
196 cell type starved in the complex environment (spent medium) and the biomass of an experimental  
197 culture of the same cell type starved in the simple environment (sterile water), at a given time  
198 point.

199 Statistical analysis of several chosen timepoints were conducted via ANOVA test as biomass ~  
200 experimental culture, followed by post hoc Tukey tests.

### 201 **Lag phase length analysis**

202 Lag phase length was defined as the time needed for a population to increase its OD by 0.01 from  
203 the OD at the beginning of regrowth. Lag phase lengths of different cultures after a given week of  
204 starvation were compared using an two-sided T-test (S2 Table1, S3 Table2).

## 205 **Model description**

206 The model simulations mirror the experimental procedures in which we first starve the cultures  
207 and then let them regrow in fresh media. The model represents the biological reality that  
208 differentiation into Q and NQ cells starts when the nutrients are nearly depleted, and that this  
209 differentiation is not instantaneous (S4 Fig.1, S5 Fig.2). The model tracks the concentration of  
210 limiting resources, nutrients available for recycling and various types of cells over time.  
211 Population dynamics in the starvation phase is determined by the death rates of Q and NQ  
212 (calculated based on [9], and nutrient recycling (which is assumed to occur in complex, but not in  
213 simple environments). The population dynamics during regrowth on fresh media is based on the  
214 standard Michaelis-Menten kinetics, taking into account different lengths of the lag phase for Q  
215 and NQ cells.

216 The model is based on previous ODE models that use a bottom-up approach to track the  
217 population dynamics in specific ecological contexts [27–29]. The detailed description of the model  
218 and model parameters can be found in the Supplementary materials (S1). The numerical solutions  
219 of the model were obtained using Matlab 2018a, and the parameters were fitted using the R global  
220 optimization package DEoptim [30].

221

## 222 **Results**

### 223 ***I. Long starvation in simple environment:***

224 **Experimental data: Advantage of Q monocultures is dynamic:** Higher proportions of stress-  
225 resistant Q cells should provide better population survival during starvation, which can be  
226 measured as exponential biomass increase after lag phase in a fresh growth medium. Accordingly,  
227 Q monocultures were expected to synchronously restart divisions soon after nutrient restoration  
228 and reach stationary phase density before other cultures. Indeed, at the beginning of the regrowth  
229 procedure, after first week of starvation, Q monocultures have a biomass advantage over mixed  
230 cultures (after 2 hours of regrowth, average biomass of Q cultures =  $8.22 \times 10^6$  cells and average  
231 biomass of mix cultures =  $6.85 \times 10^6$  cells;  $p = 0.0005$ , Fig. 2, S10.Fig7). Yet, the advantage of Q  
232 monocultures is small, and during further weeks of experiments, it is not significant (after 2 hours



233 of regrowth: 2<sup>nd</sup> week:  $p = 0.33$ , 3<sup>rd</sup> week:  $p = 0.129$ , 4<sup>th</sup> week:  $p = 0.177$ , 5<sup>th</sup> week:  $p = 0.404$ )  
234 except for 6<sup>th</sup> week ( $p = 0.037$ ).

235 **Experimental data: NQ monocultures regrow more slowly:** The increase in biomass of NQ  
236 monocultures is slower than that of the other experimental populations (Fig. 2). The significant  
237 disadvantage is already visible after 1<sup>st</sup> week of starvation, where initially NQ monocultures have  
238 a lower biomass than other cultures (after 2 hours regrowth: average biomass of NQ cultures =  
239  $4.39 \times 10^6$  cells; post-hoc Tukey test: NQ-Q:  $p = 1.31 \times 10^{-8}$ , NQ-mix:  $p = 1.74 \times 10^{-6}$ ), and only reach  
240 the biomass of Q cultures and mixed cultures after 10 hours of regrowth (Fig. 2, 10 hours  
241 regrowth: average biomass of Q cultures =  $3.27 \times 10^7$  cells, biomass of mixed cultures =  
242  $3.32 \times 10^7$  cells and biomass of NQ cultures =  $3.29 \times 10^7$  cells;  $p > 0.05$  for both NQ-Q and NQ-mixed  
243 comparisons). Also the lag phase of NQ monocultures is longer than those of other experimental  
244 populations (Fig. 5, S2.Table1) The biomass differences between NQ and other cultures increases  
245 with starvation time. During further weeks of starvation, NQ monocultures need more and more  
246 time to reach stationary phase density, exceeding 24 hours after the 4<sup>th</sup> week of starvation (Fig. 2).  
247 We compared lag phase lengths for Q and NQ monocultures starved in simple environments. The  
248 length of the lag phase increases with starvation time ( $p = 3.58 \times 10^{-8}$ , Fig. 5, S2 Table1, S3 Table2,  
249 S9.Fig.6). While at the beginning of the experiment the lag phase is on average 1.5 hours for Q  
250 and 2.2 hours for NQ monocultures, the lag phase of NQ monocultures increases to an average  
251 9.4 hours after 6<sup>th</sup> week of starvation. The increase of the lag phase of Q monocultures is much  
252 lower than that of NQ ( $p = 0.0003$ , S2 Table1, S3 Table2) and its length is on average 1.6 hours  
253 after 6 weeks of starvation.

254

## 255 *II. Analysis of model predictions*

256 **Model:** In order to shed light on possible reasons for the advantage of Q monocultures over mixed  
257 cultures, and on how this advantage depends on the length of starvation and regrowth time, we  
258 used a mathematical model that tracks the ratio of Q and NQ cells over time, as well as the  
259 concentrations of limiting nutrients (see S1 file for a detailed description of the model). The  
260 model reproduced the experimental results from the simple starvation environment: (i) the  
261 advantage of Q monocultures over other cultures increases with the starvation time and (ii) Q's  
262 advantage is noticeable at the beginning of regrowth but with increasing length of regrowth, this  
263 advantage decreases and finally disappears (Fig. 2C).

264 The model suggests that there are two factors that drive those results: death rate during starvation  
265 and lag length (if they were equal for Q and NQ cells both cell types would follow the same  
266 starvation and regrowth dynamics, (S6)). In particular the dependence of the relative biomass of  
267 different culture types on the regrowth time results from the fact that Q cells have a shorter lag  
268 length than NQ cells (S7.Fig.4A). In contrast, the dependence of the relative biomass on the  
269 starvation time can result from either (i) higher death rate for NQ cells than Q cells during  
270 starvation (S7. Fig4B) or (ii) lag lengths consistently growing with the starvation time (S7.  
271 Fig4C).

272  
273 Based on modelling, we also predicted that nutrient recycling is a potentially important factor  
274 influencing survival during starvation. The model suggests that NQ cells should be the ones that  
275 benefit from more complex starvation environment. Nutrient reusability helps NQ monocultures  
276 regardless of their lag time: the model yields analogous results even if both Q and NQ cells have  
277 no lags during regrowth (S7 Fig.4 D). This suggests that it is the nutrient recycling that drives the  
278 difference in NQ survival in the two environments.

279

280

### 281 ***III. Long starvation in complex environment:***

282 **Experimental data: Nutrient recycling is crucial for NQ cells' survival:** To test the model  
283 predictions we repeated our long starvation experiment in the complex environment, where  
284 nutrient recycling is possible. Experimental results revealed that there is no significant difference  
285 between populations at the beginning of regrowth up to 5<sup>th</sup> week of starvation (after 2 hours  
286 regrowth,  $p > 0.05$  for all NQ-Q, NQ-mixed and Q-mixed comparisons, (S10 Fig.7). Up to the 2<sup>nd</sup>  
287 week of starvation, NQ monocultures regrowth is similar to Q and mixed cultures regrowth (Fig.  
288 3A, 3B), reaching the same biomass after sufficient regrowth time (maximal density after ~5  
289 hours, 1<sup>st</sup> week, on average: biomass of Q cultures =  $3.04 \times 10^7$  cells, biomass of NQ cultures =  
290  $3.23 \times 10^7$  cells, biomass of mix cultures =  $3.21 \times 10^7$  cells;  $p > 0.05$  for all NQ-Q, NQ-mix and Q-  
291 mix comparisons). After further weeks of starvation, the differences in regrowth efficiency  
292 between NQ monocultures and mixed cultures on the one hand, and Q monocultures and mixed  
293 cultures on the other hand, gradually increase. After the 4<sup>th</sup> week of starvation, NQ monocultures  
294 reach stationary phase density within 10 hours of regrowth and a week later, they need almost 24  
295 hours to reach the same biomass (Fig 3). In terms of length of regrowth, the same pattern can be  
296 observed as described previously – with increasing regrowth time, differences between

297 populations progressively decrease and finally disappear when regrowth time is long enough for  
298 all cultures to reach stationary phase density (Fig. 3, S8. Fig.5). Direct comparison of the simple  
299 and complex starvation environment revealed that the biomass of NQ monocultures can be even  
300 11 times higher (4<sup>th</sup> week of starvation, regrowth time from 8.5 to 11.5 hours) when starved in the  
301 complex environment (Fig. 4) than when starved in the simple environment. The model results  
302 follow the general pattern of experiments (except for NQ monocultures in 5<sup>th</sup> week – probably due  
303 to an unusually long experimental lag phase in the complex environment (S3 Table 2), although  
304 some quantitative differences may also be caused by large variance in experimental data.  
305 Regrowth abilities of Q monocultures and mixed cultures were influenced by starvation medium  
306 to a lesser extent (Fig. 4).

307

#### 308 ***IV. Short starvation scenario***

309 **NQ monoculture have biomass advantage in short starvation:** Since the disadvantage of NQ is  
310 smaller when starvation time is short, we used the short starvation experiment to verify if NQ cells  
311 can have an advantage over Q cells. Our model predicted that this could be the case if the lag of  
312 NQ cells is shorter than that of Q cells (Fig. 6). To test this experimentally, we isolated Q and NQ  
313 cells from cultures that had been in stationary phase for 4 days (short starvation). Q and NQ  
314 monocultures as well as mixed cultures were prepared and the cultures were placed into a fresh  
315 rich medium for regrowth. After such short starvation the NQ monocultures restarted growth  
316 faster than the Q and mixed cultures (average lag length for Q monoculture =  $2 \pm 0,0$  hours and for  
317 NQ monoculture =  $1 \pm 0,0$  hour,  $p = 2.2 \times 10^{-16}$ ). Relative biomass analysis revealed that the  
318 advantage of NQ persists up to 8 hours after inoculation (Fig. 6, NQ-mix:  $p = 8.08 \times 10^{-4}$ , NQ-Q:  $p$   
319 =  $5.5 \times 10^{-7}$ ).

320

#### 321 **Discussion**

322 Here we examined six types of experimental populations – three cell composition types (Q and  
323 NQ monocultures, and Q+NQ mixed cultures) in two starvation media (sterile water and spent  
324 medium, representing simple and complex environments, respectively). Populations were starved  
325 for 6 weeks, and regrowth abilities (biomass increase) and lag phase length in fresh rich medium  
326 were monitored after each week. We also conducted an experiment testing experimental  
327 populations in a very short, 4 day starvation scenario.

## 328 **Q cells are adapted to survive long starvation**

329 We showed that Q monocultures have a clear biomass advantage over NQ monocultures after long  
330 starvation. The difference is especially pronounced when regrowth times are short (up to 10 hours  
331 of growth), and Q's advantage increases when populations are starved longer (Fig. 2, Fig. 3). The  
332 biomass of Q monocultures is also higher on average than those of mixed cultures (Fig. 2, Fig. 3),  
333 although the difference doesn't appear to be statistically significant. It can be explained by the fact  
334 that mixed cultures are composed of 75% of cells in the quiescent state. The advantage of Q over  
335 mixed cultures was also confirmed by the model (Fig. 2C, Fig. 3C). We can therefore hypothesize  
336 that it is mostly quiescent cells that are responsible for the survival and regrowth abilities of mixed  
337 cultures. This is a consequence of Q cells dying at a lower rate than NQ cells under starvation  
338 [9,11] and having shorter lags when entering regrowth in rich medium [11]. However, this  
339 advantage decreases and finally disappears when regrowth times increase, because after a  
340 sufficiently long time for regrowth all populations reach their carrying capacities regardless of the  
341 initial size and lags (Fig. 2, Fig. 3, S8.Fig5). This is because the maximal biomass in any case is  
342 determined by nutrient abundance in a given medium. Thus, when the regrowth time is long  
343 enough, any biomass advantage would gradually decrease and finally disappear.

## 344 **Nutrient recycling increase survival of NQ cells during long starvation in complex** 345 **environment**

346 We showed that while the starvation medium has little or no impact on Q monocultures and mixed  
347 cultures, the NQ monocultures survive relatively better in complex environment (Fig. 4). Both the  
348 simple and the complex starvation media were lacking glucose, however, in the complex  
349 environment, which consists of spent medium, nutrient and metabolite recycling was possible. It is  
350 because some nutrients, such as some amino acids, remain in the spent medium even after the  
351 onset of growth and starvation, and because additional nutrients may be released from dead cells  
352 during long starvation [27]. In addition, it had been demonstrated that excretion of nutrients and  
353 metabolites into the environment is a natural property of yeast populations and that cells can  
354 cooperatively exchange exometabolites [27,31,32]. In simple environment the nutrients released  
355 from dead cells are unlikely to be reused during starvation because the environment is too poor to  
356 provide all types of nutrients necessary for growth. However, in complex environment, released  
357 nutrients can cover missing compounds and together with nutrients remaining in spent medium,  
358 enable increased survival. Indeed, death and nutrient recycling has been demonstrated as  
359 potentially crucial in bacterial communities [27]. We captured this phenomenon in our model by  
360 varying to what extent nutrients can be recycled. Experiments performed in complex starvation

361 media confirmed model predictions that NQ monocultures do better when nutrient recycling is  
362 possible (Fig. 3, 4). This could be because the nutrient recycling simply helps to reduce the effect  
363 of death rates being higher for NQ than Q cells.

#### 364 **NQ outperform Q cells when starvation is short**

365 Shorter starvation times result in smaller growth advantages of Q monocultures compared to  
366 mixed cultures (Fig. 2, 3). This raises the question of whether there could be scenarios in which  
367 entering quiescence is not beneficial at all. The model suggested that this could be the case if the  
368 lag phase for NQ cells was shorter than for Q cells (Fig 6). Indeed we showed that in case of very  
369 short starvation (4 days), lag phase length is shorter for NQ cells (Fig.6). In particular, we showed  
370 that when a culture faces a very short starvation period, cells that have switched to the Q state  
371 experience longer lags than those that remained in the NQ state (Fig. 6). As a consequence, at the  
372 beginning of regrowth after short starvation, NQ monoculture gains an advantage over Q and  
373 mixed cultures.

#### 374 **Presence of both Q and NQ cells is adaptive for population under specific ecological** 375 **scenarios:**

376 Multiple studies have demonstrated advantages of quiescent cells over any other phenotype when  
377 populations are facing stressful conditions. Simple environments with a single, highly stressful  
378 factor (such as heat shock or toxins) indeed favour more resistant quiescent cells [9,11]. Such  
379 tests provide important information, however, natural populations usually face fluctuating  
380 environmental changes, often with gradually increasing stress [24,33].

381 Overall, our results show that switching to the Q state may not always be adaptive, and that the  
382 benefits of this physiological transition depends on the ecological context. When the starvation  
383 period is very short (e.g. 4 days) and beneficial conditions are restored, cells that do not switch to  
384 quiescence benefit from a shorter lag phase. On the other hand, quiescent cells survive long  
385 starvation much better. Moreover, when nutrient recycling during starvation is possible, NQ cells  
386 perform as well as Q if the starvation is no longer than 2 weeks.

387 In particular, the fact that natural populations are phenotypically heterogeneous during starvation  
388 and are composed of both Q and NQ cells may not be a side effect of an imperfect switch to  
389 quiescence, but may actually be a proper bet hedging strategy under uncertain ecological  
390 conditions. It will be interesting to further test these assertions using evolution experiments in

391 which populations are subject to different lengths and frequencies of periods of starvation and  
392 regrowth.

393

#### 394 **Data availability**

395 Experimental data generated in laboratory during this study will be available upon request or  
396 deposited to online server if the ms is accepted for publication.

397

#### 398 **Code availability**

399 The model code is publicly available on GitHub. [https://github.com/bognabognabogna/Q-NQ-](https://github.com/bognabognabogna/Q-NQ-data-analysis/tree/master/Matlab_scripts)  
400 [data-analysis/tree/master/Matlab\\_scripts](https://github.com/bognabognabogna/Q-NQ-data-analysis/tree/master/Matlab_scripts)

401

#### 402 **Acknowledgements**

403 We would like to thank Donna Katie McCullough, Klaudia Wilk and Anna Smoter for help in  
404 laboratory and Katarzyna Tomala, Richard Lindsay and Rafael Carlos Reding for insightful  
405 comments. The work was funded by the National Science Centre, Poland via an OPUS grant to  
406 D.W-S. No. 2017/25/B/NZ8/01035, the Biology Department Research subsidy No.  
407 N18/DBS/000003 and N18/MNW/000013 to MO. MD was supported by NSERC Award Number:  
408 041931Y. BS was supported by Polish National Agency for Academic Exchange by grant No  
409 PPN/PPO/2018/00021/U/00001.

410

411

#### 412 **References**

- 413 1. Ackermann M, Stecher B, Freed NE, Songhet P, Hardt WD, Doebeli M. 2008 Self-  
414 destructive cooperation mediated by phenotypic noise. *Nature* **454**, 987–990.  
415 (doi:10.1038/nature07067)
- 416 2. Schreiber F, Ackermann M. 2020 Environmental drivers of metabolic heterogeneity in  
417 clonal microbial populations. *Curr. Opin. Biotechnol.* **62**, 202–211.  
418 (doi:10.1016/j.copbio.2019.11.018)
- 419 3. Opalek M, Wloch-Salamon D. 2020 Aspects of Multicellularity in *Saccharomyces*  
420 *cerevisiae* Yeast: A Review of Evolutionary and Physiological Mechanisms. *Genes (Basel)*.  
421 **11**, 690. (doi:10.3390/genes11060690)

- 422 4. Bojsen R, Regenber B, Folkesson A. 2014 *Saccharomyces cerevisiae* biofilm tolerance  
423 towards systemic antifungals depends on growth phase. *BMC Microbiol.* **14**, 1–10.  
424 (doi:10.1186/s12866-014-0305-4)
- 425 5. Gray J V, Petsko GA, Johnston GC, Ringe D, Singer RA, Werner-washburne M. 2004  
426 “Sleeping Beauty”: Quiescence in. *Society* **68**, 187–206. (doi:10.1128/MMBR.68.2.187–  
427 206.2004)
- 428 6. Sagot I, Laporte D. 2019 The cell biology of quiescent yeast – a diversity of individual  
429 scenarios. *J. Cell Sci.* **132**, jcs213025. (doi:10.1242/jcs.213025)
- 430 7. Sagot I, Laporte D. 2019 Quiescence, an individual journey. *Curr. Genet.* **65**, 695–699.  
431 (doi:10.1007/s00294-018-00928-w)
- 432 8. van Velthoven CTJ, Rando TA. 2019 Stem Cell Quiescence: Dynamism, Restraint, and  
433 Cellular Idling. *Cell Stem Cell* **24**, 213–225. (doi:10.1016/j.stem.2019.01.001)
- 434 9. Allen C *et al.* 2006 Isolation of quiescent and nonquiescent cells from yeast stationary-  
435 phase cultures. *J. Cell Biol.* **174**, 89–100. (doi:10.1083/jcb.200604072)
- 436 10. Li L, Miles S, Breeden LL. 2015 A Genetic Screen for *Saccharomyces cerevisiae* Mutants  
437 That Fail to Enter Quiescence. *G3 Genes|Genomes|Genetics* **5**, 1783–1795.  
438 (doi:10.1534/g3.115.019091)
- 439 11. Lee H-Y, Cheng K-Y, Chao J-C, Leu J-Y. 2016 Differentiated cytoplasmic granule  
440 formation in quiescent and non-quiescent cells upon chronological aging. *Microb. Cell* **3**,  
441 109–119. (doi:10.15698/mic2016.03.484)
- 442 12. Barré BP *et al.* 2020 Intragenic repeat expansion in the cell wall protein gene HPF1  
443 controls yeast chronological aging. *Genome Res.* **30**, 697–710. (doi:10.1101/gr.253351.119)
- 444 13. de Virgilio C. 2012 The essence of yeast quiescence. *FEMS Microbiol. Rev.* **36**, 306–339.  
445 (doi:10.1111/j.1574-6976.2011.00287.x)
- 446 14. Dhawan J, Laxman S. 2015 Decoding the stem cell quiescence cycle - Lessons from yeast  
447 for regenerative biology. *J. Cell Sci.* **128**, 4467–4474. (doi:10.1242/jcs.177758)
- 448 15. Wloch-Salamon DM, Tomala K, Aggeli D, Dunn B. 2017 Adaptive Roles of SSY1 and  
449 SIR3 During Cycles of Growth and Starvation in *Saccharomyces cerevisiae* Populations  
450 Enriched for Quiescent or Nonquiescent Cells. *G3&#58; Genes|Genomes|Genetics* **7**,

- 451 1899–1911. (doi:10.1534/g3.117.041749)
- 452 16. Krishna S, Laxman S, Lew DJ. 2018 A minimal “ push – pull ” bistability model explains  
453 oscillations between quiescent and proliferative cell states. **29**, 2243–2258.  
454 (doi:10.1091/mbc.E18-01-0017)
- 455 17. Honigberg SM. 2016 Similar environments but diverse fates: Responses of budding yeast to  
456 nutrient deprivation. *Microb. Cell* **3**, 302–328. (doi:10.15698/mic2016.08.516)
- 457 18. Lee H-Y, Cheng K-Y, Chao J-C, Leu J-Y. 2016 Differentiated cytoplasmic granule  
458 formation in quiescent and non-quiescent cells upon chronological aging. *Microb. Cell* **3**,  
459 109–119. (doi:10.15698/mic2016.03.484)
- 460 19. Aragon AD *et al.* 2008 Characterization of Differentiated Quiescent and Nonquiescent  
461 Cells in Yeast Stationary-Phase Cultures. *Mol. Biol. Cell* **19**, 1271–1280.  
462 (doi:10.1091/mbc.e07-07-0666)
- 463 20. Werner-washburne M, Braun E, Johnston GC, Singer RA. 1993 Stationary Phase in the  
464 Yeast *Saccharomyces cerevisiae*. **57**, 383–401.
- 465 21. Marek A, Opalek M, Kałdon A, Mickowska B, Wloch-Salamon D. 2020 Hypersensitive  
466 SSY1 mutations negatively influence transition to quiescence in yeast *Saccharomyces*  
467 *cerevisiae*. *Yeast* , yea.3536. (doi:10.1002/yea.3536)
- 468 22. Wloch-Salamon DM, Fisher RM, Regenberg B. 2017 Division of labour in the yeast:  
469 *Saccharomyces cerevisiae*. *Yeast* **34**, 399–406. (doi:10.1002/yea.3241)
- 470 23. Varahan S, Walvekar A, Sinha V, Krishna S, Laxman S. 2019 Metabolic constraints drive  
471 self-organization of specialized cell groups. *Elife* **8**. (doi:10.7554/elife.46735)
- 472 24. Bagamery LE, Justman QA, Garner EC, Murray AW. 2020 A Putative Bet-Hedging  
473 Strategy Buffers Budding Yeast against Environmental Instability. *Curr. Biol.* , 1–16.  
474 (doi:10.1016/j.cub.2020.08.092)
- 475 25. Cubillos FA, Louis EJ, Liti G. 2009 Generation of a large set of genetically tractable  
476 haploid and diploid *Saccharomyces* strains. *FEMS Yeast Res.* **9**, 1217–1225.  
477 (doi:10.1111/j.1567-1364.2009.00583.x)
- 478 26. DeLuna A, Vetsigian K, Shores N, Hegreness M, Colón-González M, Chao S, Kishony R.  
479 2008 Exposing the fitness contribution of duplicated genes. *Nat. Genet.* **40**, 676–681.



- 480 (doi:10.1038/ng.123)
- 481 27. Takano S, Pawlowska BJ, Gudel I, Yomo T, Tsuru S. 2017 Density-dependent recycling  
482 promotes the long-term survival of bacterial populations during periods of starvation. *MBio*  
483 **8**, 1–14. (doi:10.1128/mBio.02336-16)
- 484 28. Lindsay RJ, Pawlowska BJ, Gudelj I. 2018 When increasing population density can  
485 promote the evolution of metabolic cooperation. *ISME J.* **12**, 849–859.  
486 (doi:10.1038/s41396-017-0016-6)
- 487 29. Lindsay RJ, Pawlowska BJ, Gudelj I. 2019 Privatization of public goods can cause  
488 population decline. *Nat. Ecol. Evol.* **3**, 1206–1216. (doi:10.1038/s41559-019-0944-9)
- 489 30. Peterson B, Ulrich J, Boudt K. 2020 Package ‘ DEoptim ’.
- 490 31. Campbell K *et al.* 2015 Self-establishing communities enable cooperative metabolite  
491 exchange in a eukaryote. *Elife* **4**, 1–23. (doi:10.7554/eLife.09943)
- 492 32. Ponomarova O *et al.* 2017 Yeast Creates a Niche for Symbiotic Lactic Acid Bacteria  
493 through Nitrogen Overflow. *Cell Syst.* **5**, 345-357.e6. (doi:10.1016/j.cels.2017.09.002)
- 494 33. Boynton PJ, Greig D. 2014 The ecology and evolution of non-domesticated *Saccharomyces*  
495 species. *Yeast* **26**, n/a-n/a. (doi:10.1002/yea.3040)
- 496

497 Fig. 1. Schematic representation of performed experiments. A – After inoculation, population was  
498 growing on agar YPD plate for four days, after that Q (navy) and NQ (green) cells were separated  
499 by centrifugation on density gradient. B – Six types of experimental populations were prepared,  
500 each type was prepared in five repetitions, giving all together 30 independent cultures. First all Q  
501 and NQ cells acquired by fractionation procedure were merged and diluted to equal OD. Next, mix  
502 cultures were prepared by mixing Q and NQ cells in 3:1 proportion. Then cells were pelleted and  
503 resuspended in starvation medium – sterile water for simple environment (blue background) and  
504 spent medium for complex environment (beige background). C – To asses starvation survival, we  
505 weekly took samples of experimental cultures. Cells were pelleted and resuspended in fresh rich  
506 medium. Then samples were loaded into 96-well plate and placed into plate reader for regrowth.  
507 The samples were incubated for 24 hours in 30°C with shaking, and OD measurements were taken  
508 every half an hour. OD measurements were recalculated into biomass and relative biomass. Based  
509 on experimental data, the model parameters were fitted.

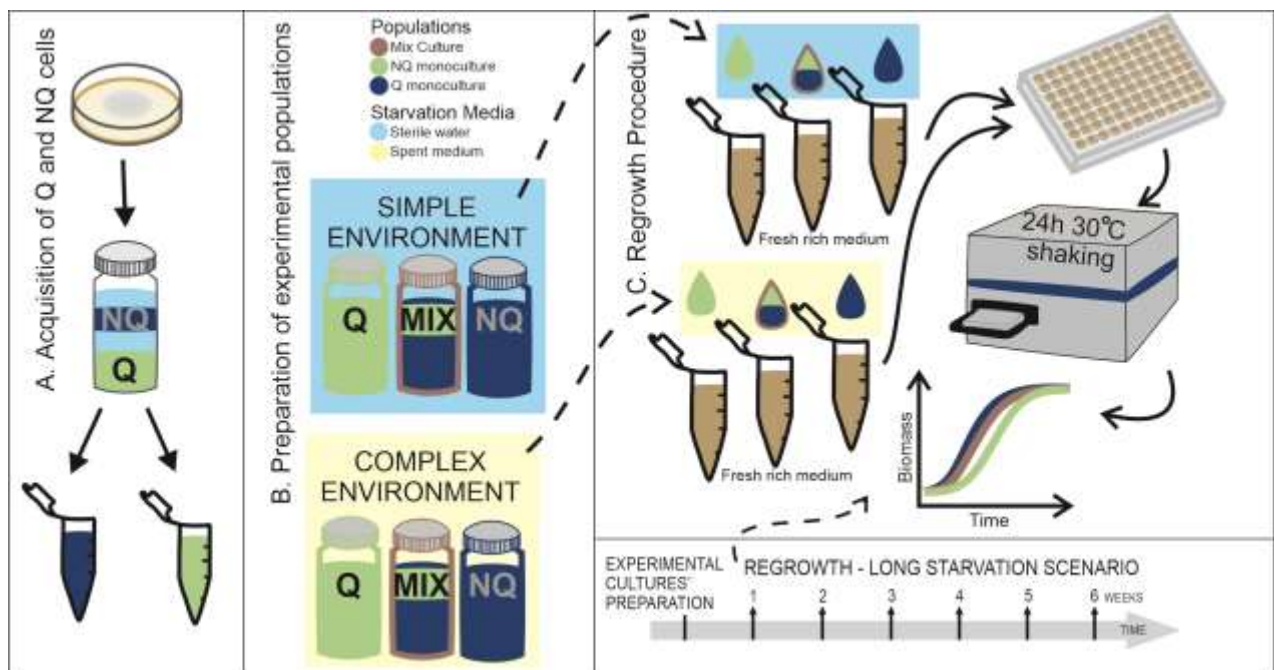

511 Fig. 2. Simple Environment results

512 Results from the starvation in the simple environment. Subsequent vertical graphs illustrate the  
513 length of starvation in weeks (1 to 6). The regrowth time (in hours) illustrate time elapsed since  
514 placing samples from starved experimental cultures into fresh media for regrowth. Points illustrate  
515 the averaged results from five repetitions (except of week 5 and 3 for NQ monoculture where  
516 there were four repetitions each), and error bars show standard deviation.

517 The Q (navy) and mix (brown) cultures display similar growth curves until 3<sup>rd</sup> week of starvation.  
518 When starved for 4 weeks or longer, growth curve of Q monoculture is increasing sharper,  
519 reaching flat shape of stationary phase earlier. Growth curve of the NQ monoculture (green) since  
520 1<sup>st</sup> week of starvation is the flattest and it reaches stationary phase later than both mix and Q  
521 cultures.

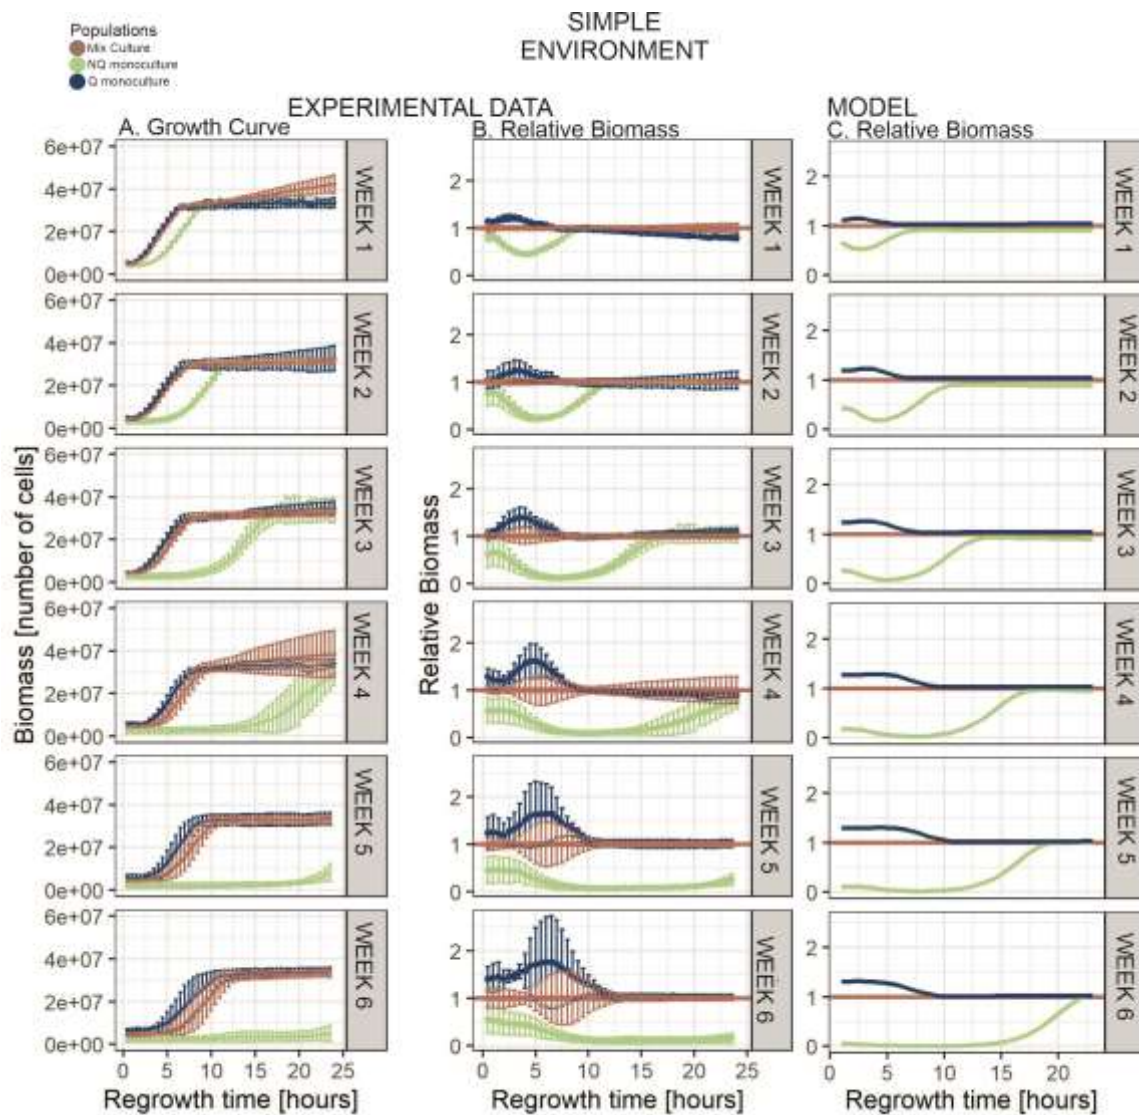

523 Fig. 3. Complex environment results

524 Results from starvation in the complex environment. Subsequent vertical graphs illustrate the  
525 length of starvation in weeks (1 to 6). The regrowth time (in hours) illustrate time elapsed since  
526 placing samples from starved experimental cultures into fresh media for regrowth. Points illustrate  
527 the averaged results from five repetitions (except of week 6 for NQ monoculture where there were  
528 three repetitions), and error bars show standard deviation.

529 The growth curves of all starved populations are similar until 3<sup>rd</sup> week of starvation. When starved  
530 for 4 weeks or longer, the growth curve of NQ monocultures gradually flatten. Q and mixed  
531 cultures display similar shapes of growth curves throughout whole starvation time.

532

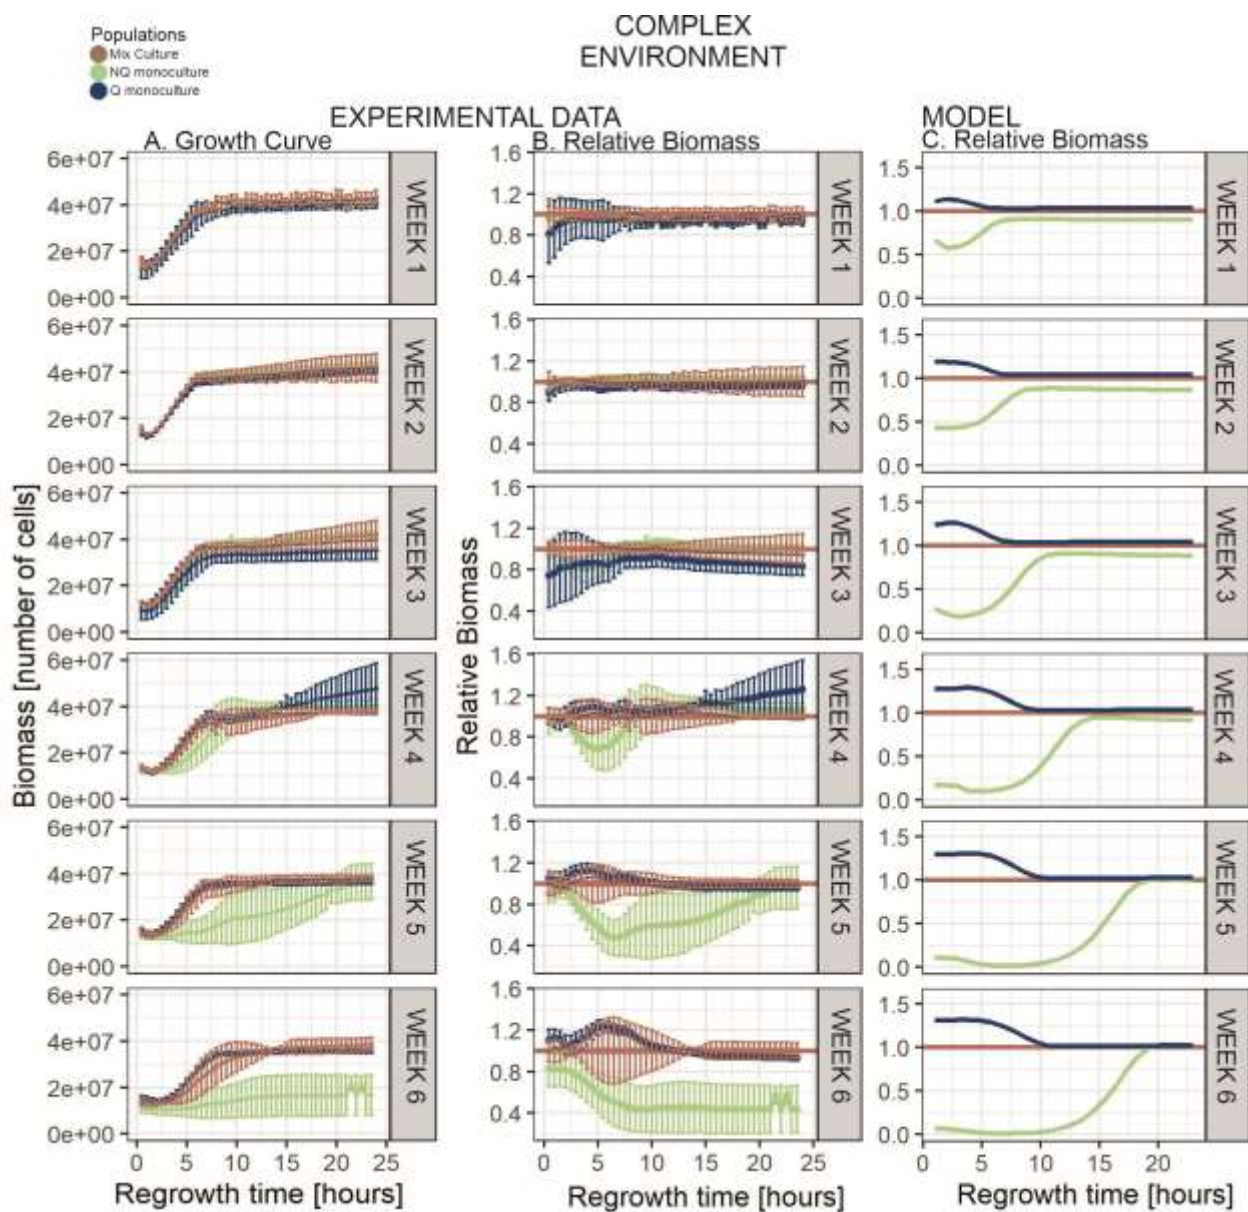

533

534 Fig. 4. Complex vs simple  
 535 environment  
 536 Starvation environments'  
 537 impact on cultures' starvation  
 538 survival. Subsequent vertical  
 539 graphs illustrate length of  
 540 starvation in weeks (1 to 6).  
 541 Regrowth time (in hours)  
 542 illustrate time elapsed since  
 543 placing samples from starved  
 544 experimental cultures into  
 545 fresh media for regrowth.  
 546 Relative biomass was  
 547 calculated as a ratio of  
 548 biomass of given cell type  
 549 culture in complex  
 550 environment to the same cell  
 551 type culture biomass in simple  
 552 environment (dots). Biomass  
 553 of a culture in simple  
 554 environment equals 1 (solid  
 555 line).  
 556 NQ monocultures survive  
 557 relatively better when starved  
 558 in complex than simple  
 559 environment. Q and mix  
 560 cultures benefit slightly at the  
 561 beginning of regrowth (up to  
 562 10 hours) when starved in  
 563 complex environment.

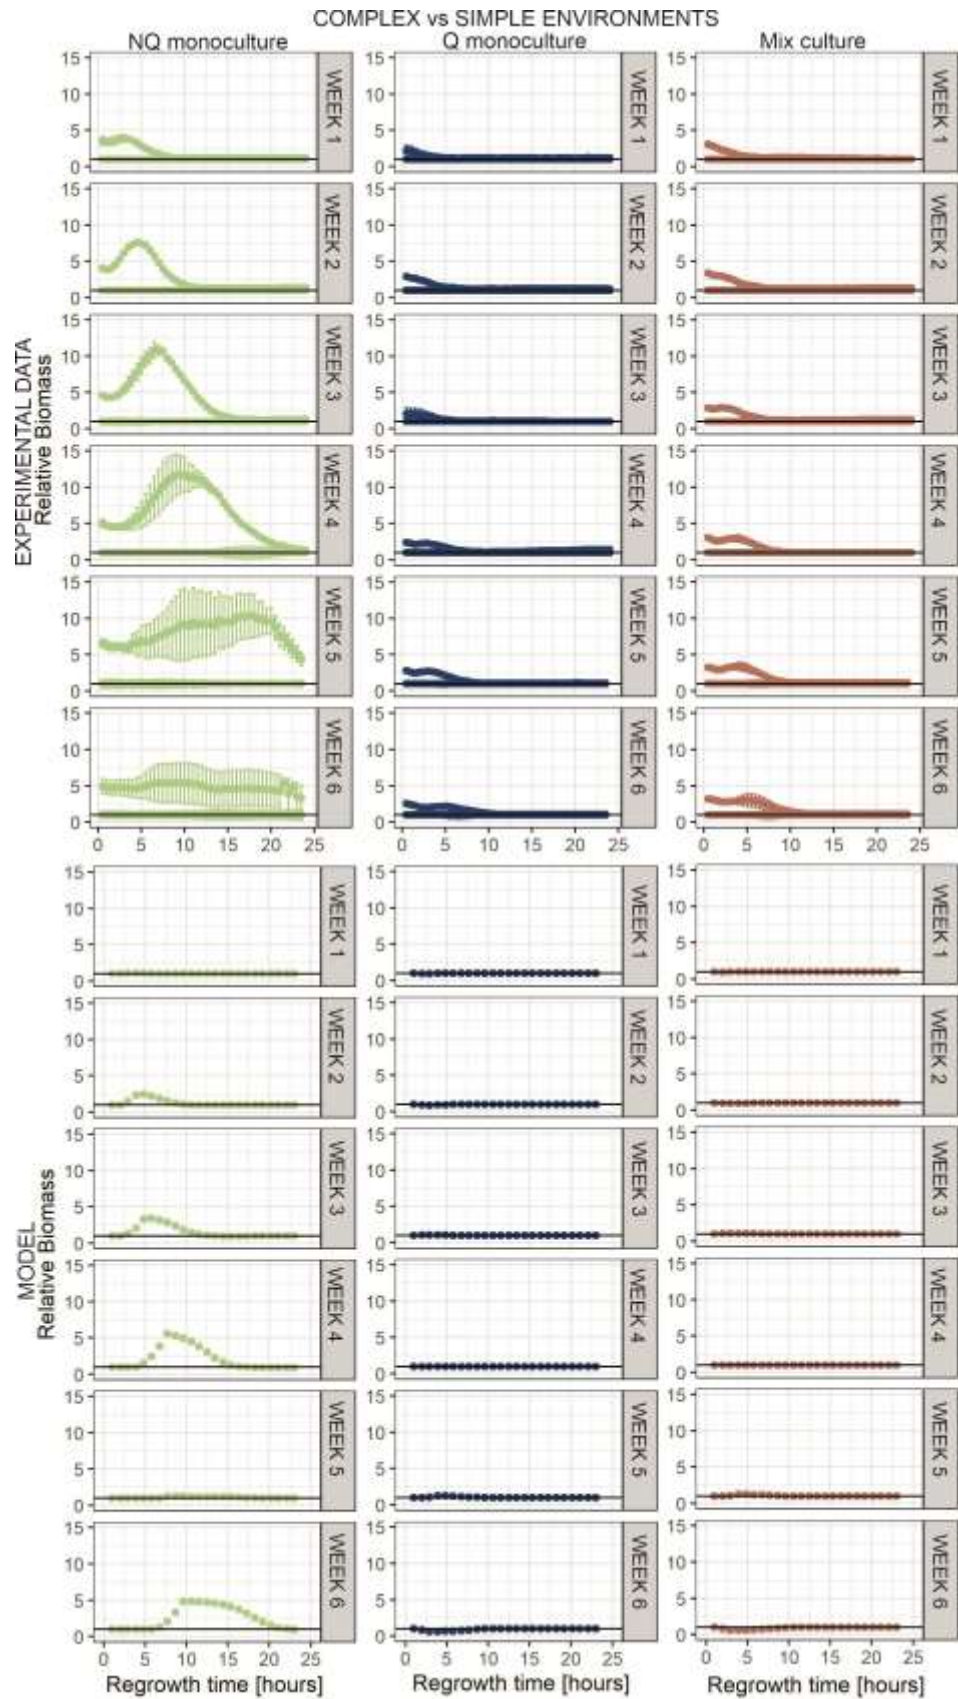

564

565

566 Fig. 5. – Average lag phase length of experimental monocultures during starvation. Bars represent  
567 standard deviation. Length of lag phase evidently increase for NQ monoculture and it is especially  
568 visible in simple environment. Meanwhile, for Q monoculture lag phase length is almost constant  
569 through whole starvation time.

570

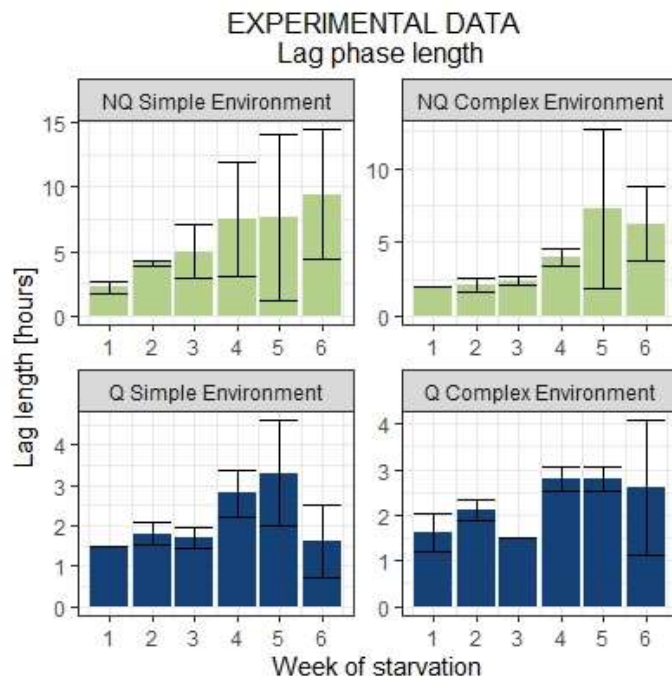

571 Fig. 6. – Short starvation scenario

572 We modeled experimental populations in short starvation scenario. NQ monoculture gain  
573 advantage over both Q and mix cultures up to 5 hours of growth. The model suggested that this  
574 advantage is due to shorter lag phase of NQ cells when starved for short period of time. The model  
575 results were confirmed by laboratory experiment. When starved only for 4 days, NQ monoculture  
576 indeed outcompete mix and Q cultures at the beginning of regrowth (up to ~7 hours). Moreover,  
577 the lag phase of NQ cells is shorter than Q cells (the bars represent average from 16 repetitions).

578

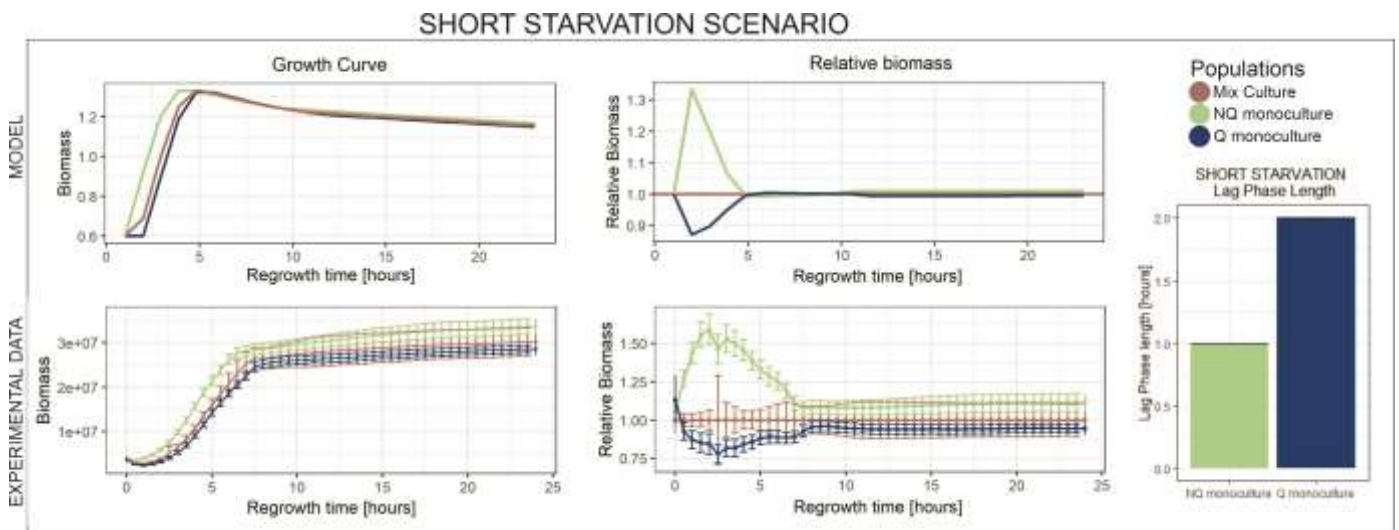

579
